# Supplementary material for: Does Physical Inactivity Induce Significant Changes in Human Gut Microbiota? New Answers Using the Dry Immersion Hypoactivity Model
Source: MDPI journal article supplement (doi:10.3390/nu13113865), 2021-10-28
Supplement: s1 [file s1]

Supplementary Figures:

**Supplemental Fig S1.** Absence of thigh-cuffs effect on  $\alpha$ -diversity gut microbiota before (DI-0) and after (DI-5) 5-days Dry Immersion in healthy men; CTL = control group; CUFFS = group with cuffs.

**Supplemental Fig S2.** Absence of thigh-cuffs effect on  $\beta$ -diversity gut microbiota before (DI-0) and after (DI-5) 5-days of Dry Immersion in healthy men.  $P$  = phylum ; CTL = control group; CUFFS = group with cuffs.

**Supplemental Fig S3.** Graphical representations of OTUs affiliated to families belonging to Actinobacteria<sup>P</sup>, Bacteroidetes<sup>P</sup>, Firmicutes<sup>P</sup> and Proteobacteria<sup>P</sup> before (DI-0) and after (DI-5) 5-days of Dry Immersion in healthy men.

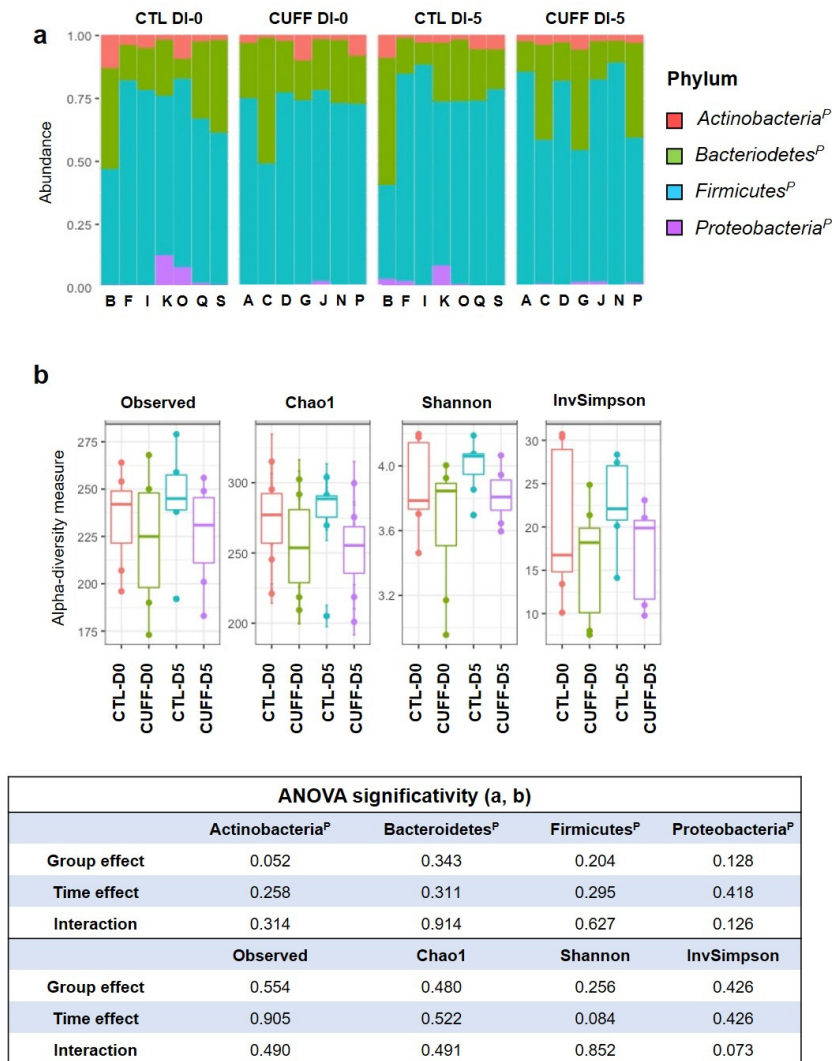

**Supplemental Fig S1.** Absence of thigh-cuffs effect on  $\alpha$ -diversity gut microbiota before (DI-0) and after (DI-5) 5-days Dry Immersion in healthy men; CTL = control group; CUFFS = group with cuffs.

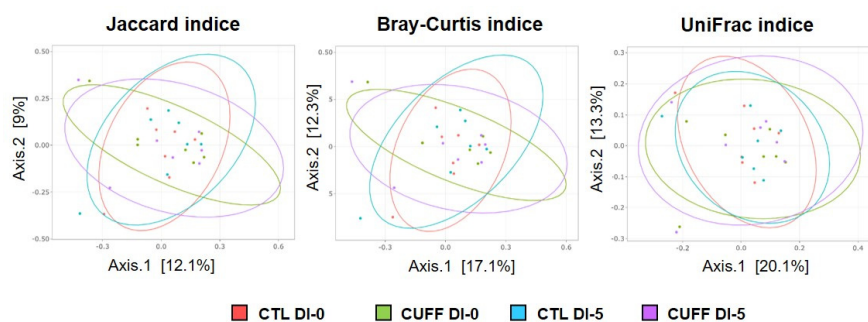

| PERMANOVA significativity |           |             |         |
|---------------------------|-----------|-------------|---------|
|                           | Jaccard   | Bray-Curtis | UniFrac |
| Group effect              | 0.069     | 0.997       | 0.996   |
| Time effect               | p = 0.998 | 0.997       | 0.999   |
| Interaction               | 0.998     | 0.111       | 0.999   |

**Supplemental Fig S2.** Absence of thigh-cuffs effect on  $\beta$ -diversity gut microbiota before (DI-0) and after (DI-5) 5-days of Dry Immersion in healthy men. P = phylum ; CTL = control group; CUFFS = group with cuffs.

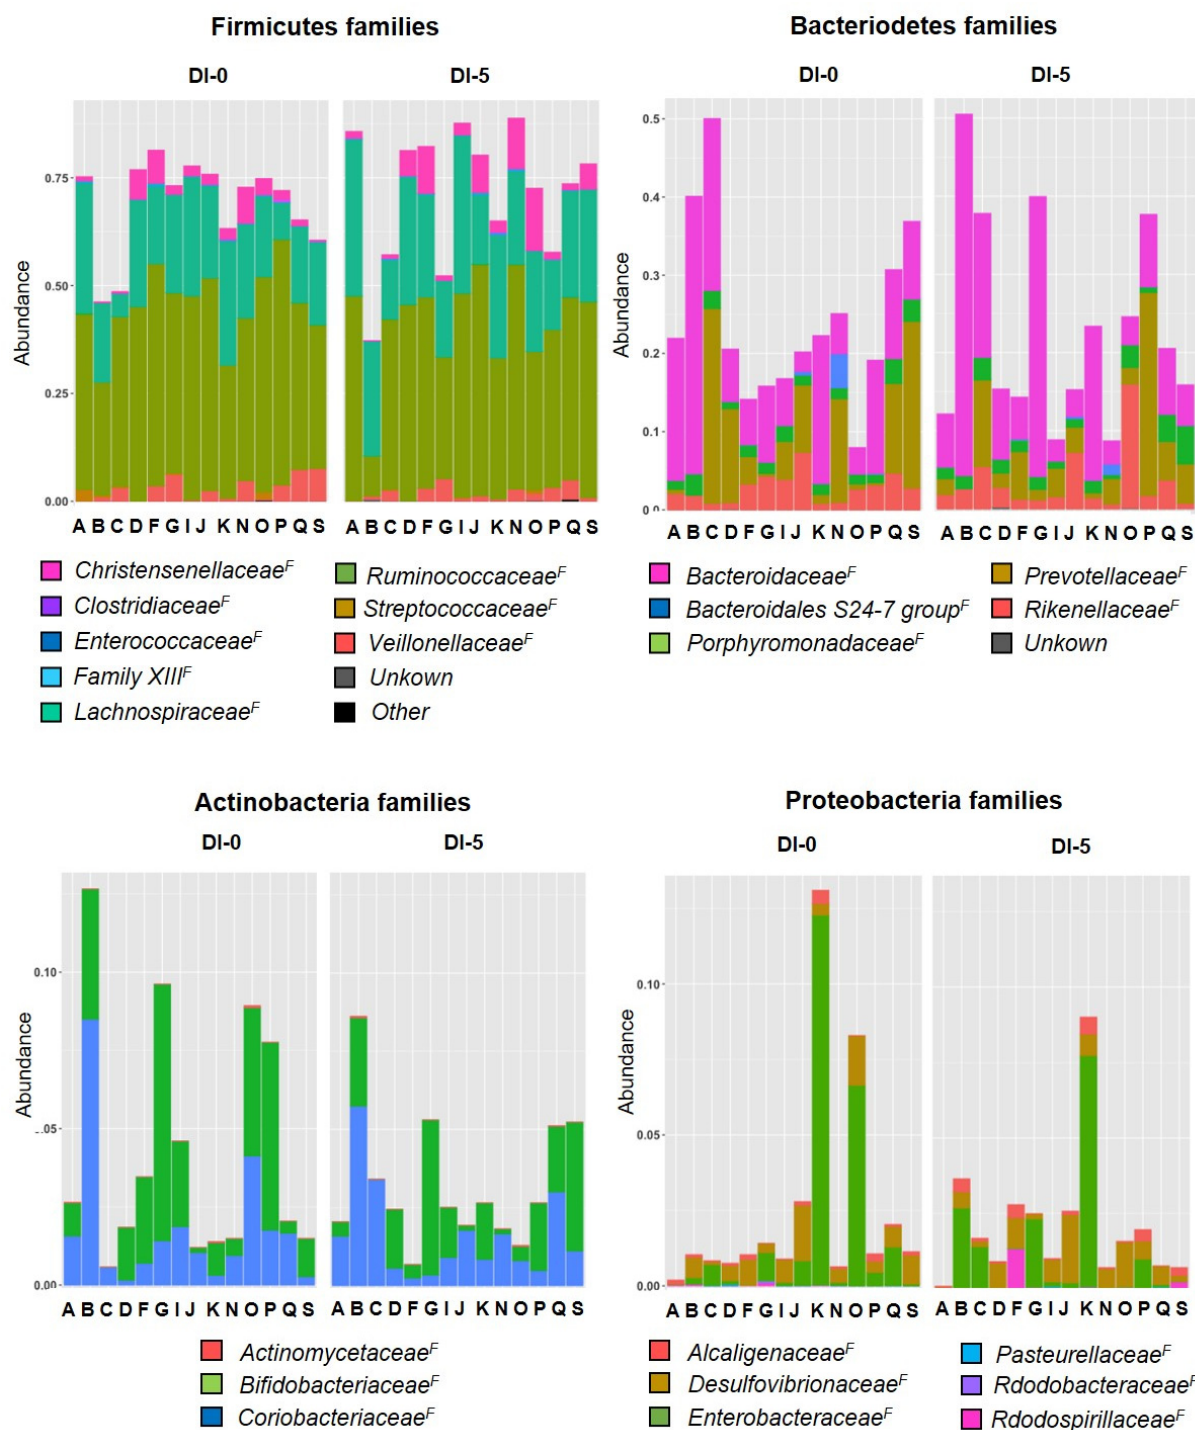

**Supplemental Fig S3.** Graphical representations of OTUs affiliated to families belonging to Actinobacteria<sup>P</sup>, Bacteroidetes<sup>P</sup>, Firmicutes<sup>P</sup> and Proteobacteria<sup>P</sup> before (DI-0) and after (DI-5) 5-days of Dry Immersion in healthy men.
